# Supplementary material for: Multi-dimensional templated synthesis of hierarchical Fe2O3/NiO composites and their superior ethanol sensing properties promoted by nanoscale p–n heterojunctions
Source: Royal Society of Chemistry journal article supplement (doi:10.1039/c9dt04185k), 2019-12-23
Supplement: c9dt04185k1.pdf [file c9dt04185k1.pdf]

Supporting Information for

**Multi-dimensional templated synthesis of hierarchical Fe<sub>2</sub>O<sub>3</sub>/NiO composites and their superior ethanol sensing property promoted by nanoscale p-n heterojunctions**

***AUTHORS***

*Shuwen Dong<sup>1</sup>, Di Wu<sup>2</sup>, Wenyuan Gao<sup>1</sup>, Hongshun Hao<sup>1</sup>, Guishan Liu<sup>1</sup> and Shuang Yan<sup>1,\*</sup>*

***ADDRESS***

*1. School of Textile and Material Engineering, Dalian Polytechnic University, Dalian 116034, China*

*2. Dalian Scientific Test and Control Technology Institute, Dalian, 116001, China*

***Corresponding Author:***

*Shuang Yan*

*E-mail: [yanye150@outlook.com](mailto:yanye150@outlook.com)*

### Fabrication of pure $\text{Fe}_2\text{O}_3$ nanofibers

0.8g PAN was first added to 10 ml DMF to make an 8 wt.% solution, 0.4g  $\text{FeCl}_3 \cdot 6\text{H}_2\text{O}$  was then added to the solution as the electrospinning precursor solution. The electrospinning parameters were as followings: the flow rate of solution was  $0.5\text{ml} \cdot \text{h}^{-1}$ ; the voltage was 12 kV and the distance was 15 cm. The as-collected PAN- $\text{FeCl}_3$  nanofibers were annealed at  $600^\circ\text{C}$  in air with a heating rate of  $1^\circ\text{C} \cdot \text{min}^{-1}$  and kept for 4h. The as-obtained sample was named as p- $\text{Fe}_2\text{O}_3$ .

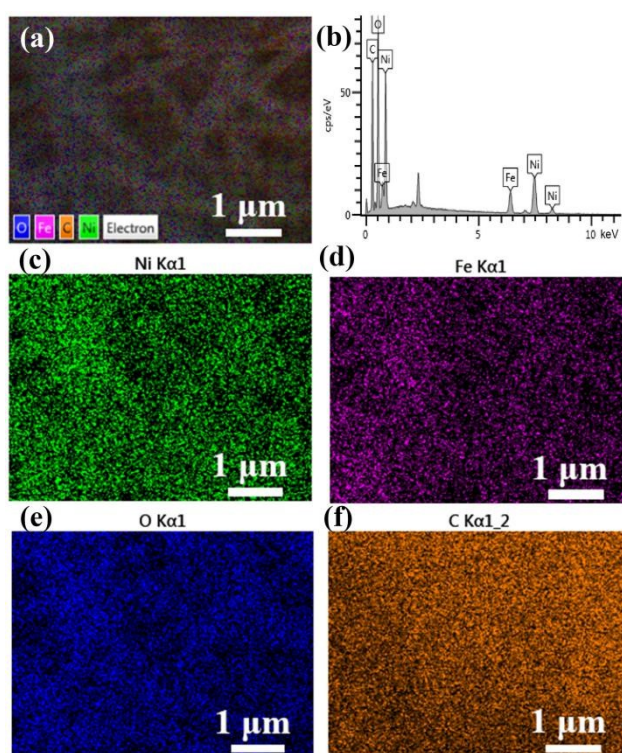

**Figure S1.** (a-b) EDS spectra of the  $\text{Fe}_2\text{O}_3/\text{NiO}$ -1 composites and EDS elemental mapping images of (c) Ni, (d) Fe, (e) O and (f) C.

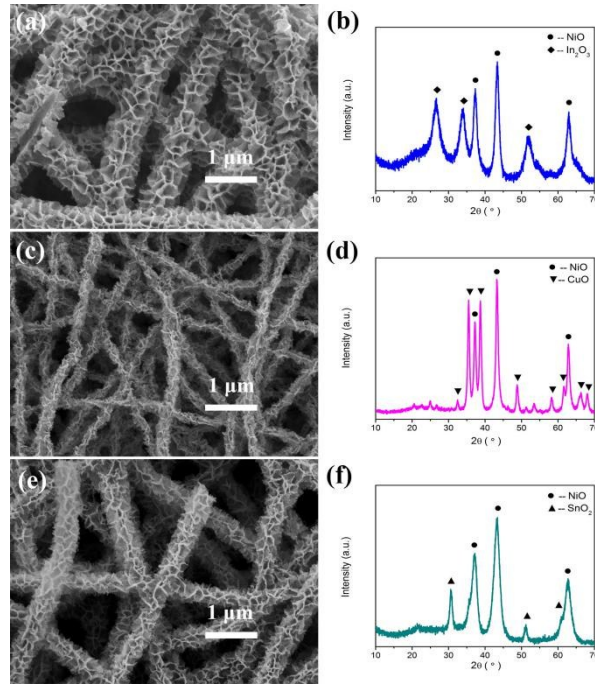

**Figure S2.** SEM images and XRD patterns of the as-prepared (a-b) In<sub>2</sub>O<sub>3</sub>/NiO, (c-d) CuO /NiO and (e-f) SnO<sub>2</sub>/NiO composites.

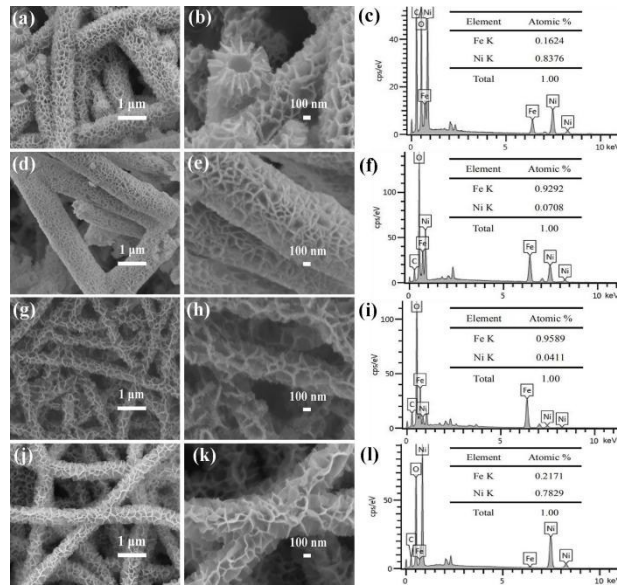

**Figure S3.** SEM images and the corresponding EDS spectra of the hierarchical  $\frac{x}{2}\text{Fe}_2\text{O}_3/(1-x)\text{NiO}$  composites: (a-c) Fe<sub>2</sub>O<sub>3</sub>/NiO-2, (d-f) Fe<sub>2</sub>O<sub>3</sub>/NiO-3, (g-i) Fe<sub>2</sub>O<sub>3</sub>/NiO-5 and (j-l) Fe<sub>2</sub>O<sub>3</sub>/NiO-1(OS) with the relative content from ICP method (inset).

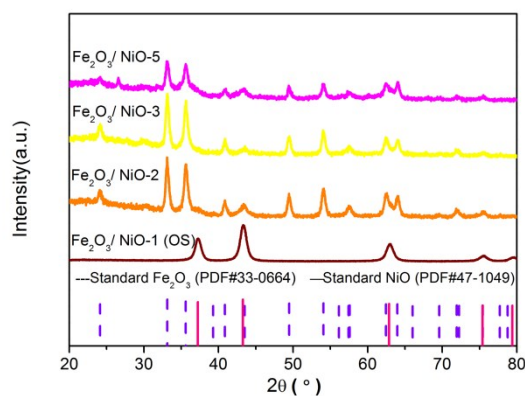

**Figure S4.** XRD patterns of  $\text{Fe}_2\text{O}_3/\text{NiO-1(OS)}$ ,  $\text{Fe}_2\text{O}_3/\text{NiO-2}$ ,  $\text{Fe}_2\text{O}_3/\text{NiO-3}$  and  $\text{Fe}_2\text{O}_3/\text{NiO-5}$ .

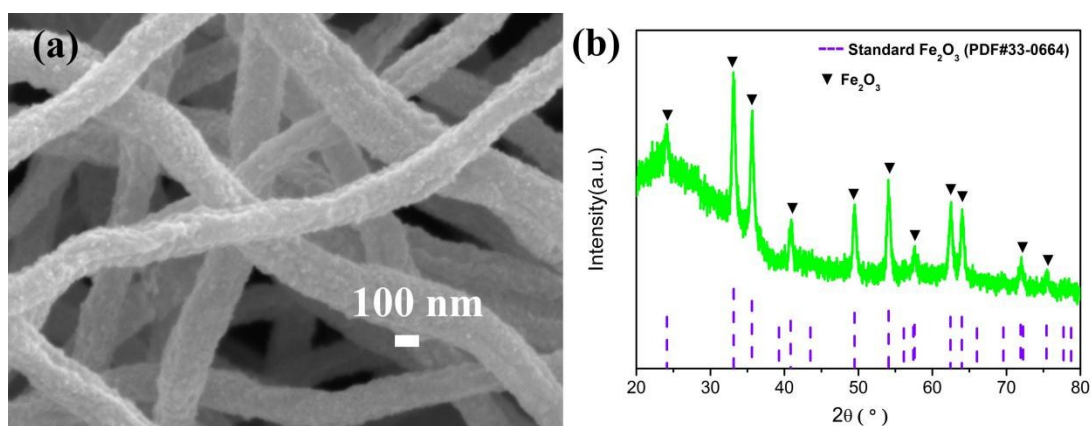

**Figure S5.** SEM image and XRD pattern of p- $\text{Fe}_2\text{O}_3$ .

**Table S1.** Linear fitting data of different samples

| Sample                                    | $R^2$   | Slope Value | Standard Error | Intercept Value | Standard Error |
|-------------------------------------------|---------|-------------|----------------|-----------------|----------------|
| p-NiO                                     | 0.88717 | 0.16578     | 0.02074        | -0.9193         | 0.03913        |
| p- $\text{Fe}_2\text{O}_3$                | 0.92234 | 0.14748     | 0.01505        | -0.02647        | 0.02844        |
| $\text{Fe}_2\text{O}_3/\text{NiO-1 (MS)}$ | 0.95982 | 0.33966     | 0.02450        | -0.17817        | 0.04630        |
| $\text{Fe}_2\text{O}_3/\text{NiO-1}$      | 0.96565 | 0.49459     | 0.03291        | -0.07046        | 0.06218        |
| $\text{Fe}_2\text{O}_3/\text{NiO-4}$      | 0.94889 | 0.33753     | 0.02760        | 0.00313         | 0.05216        |
